# Supplementary material for: Flexible CsPbBr3 microwire photodetector with a performance enhanced by covering it with an Ag nanolayer
Source: Royal Society of Chemistry journal article supplement (doi:10.1039/d2ce01040b), 2022-01-01
Supplement: d2ce01040b1.pdf [file d2ce01040b1.pdf]

## Electronic Supplementary Information

### **Flexible CsPbBr<sub>3</sub> microwire photodetector with performance enhanced by covering Ag nanolayer**

Baihe Hanqi,<sup>a</sup> Mingming Jiang,<sup>a,b,\*</sup> Chengxin Lin,<sup>a</sup> Maosheng Liu,<sup>a</sup> Daning Shi,<sup>a</sup> Caixia Kan,<sup>a,b,\*</sup>

<sup>a</sup> *College of Science, Nanjing University of Aeronautics and Astronautics, Nanjing 210016, China;*

<sup>b</sup> *MIIT Key Laboratory of Aerospace Information Materials and Physics, Nanjing University of Aeronautics and Astronautics, Nanjing 211106, China;*

*\* Email: mmjiang@nuaa.edu.cn. cxkan@nuaa.edu.cn*

## Supplementary figures

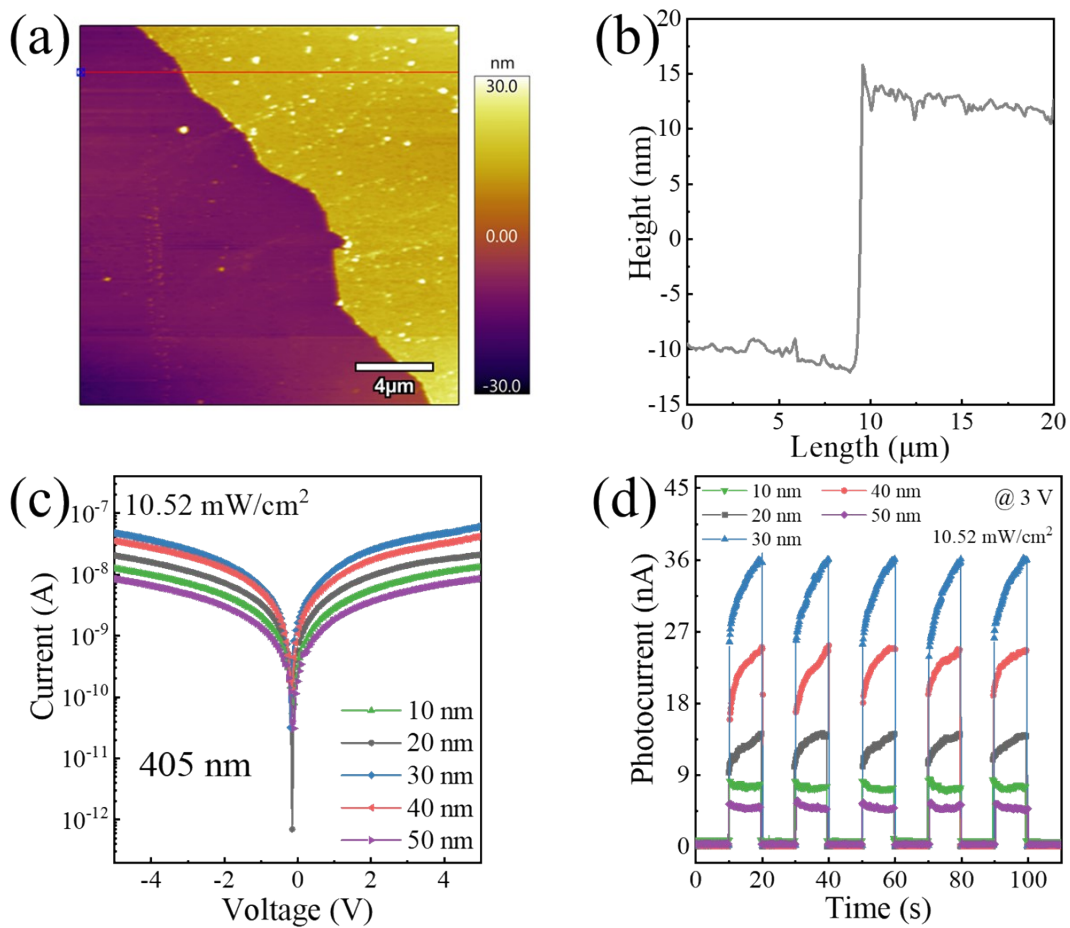

**Fig. S1** AFM images of two-dimensional (2D) topography (a) and a cross-section analysis of CsPbBr<sub>3</sub> MWs (b). (c) Logarithmic I-V curves of the fabricated single MW photodetectors covered by Ag nanolayer in darkness and upon 405 nm light illumination of different thickness. (d) Time-dependent on/off photo switching tests of the fabricated detectors of different Ag thickness with the light (405 nm, 10.52 mW/cm<sup>2</sup>) on and off at the bias voltage of 3 V.
